# Supplementary material
Source: ML conference proceedings conference paper supplement (https://openreview.net/forum?id=cZVBRg59eb)

Player 1

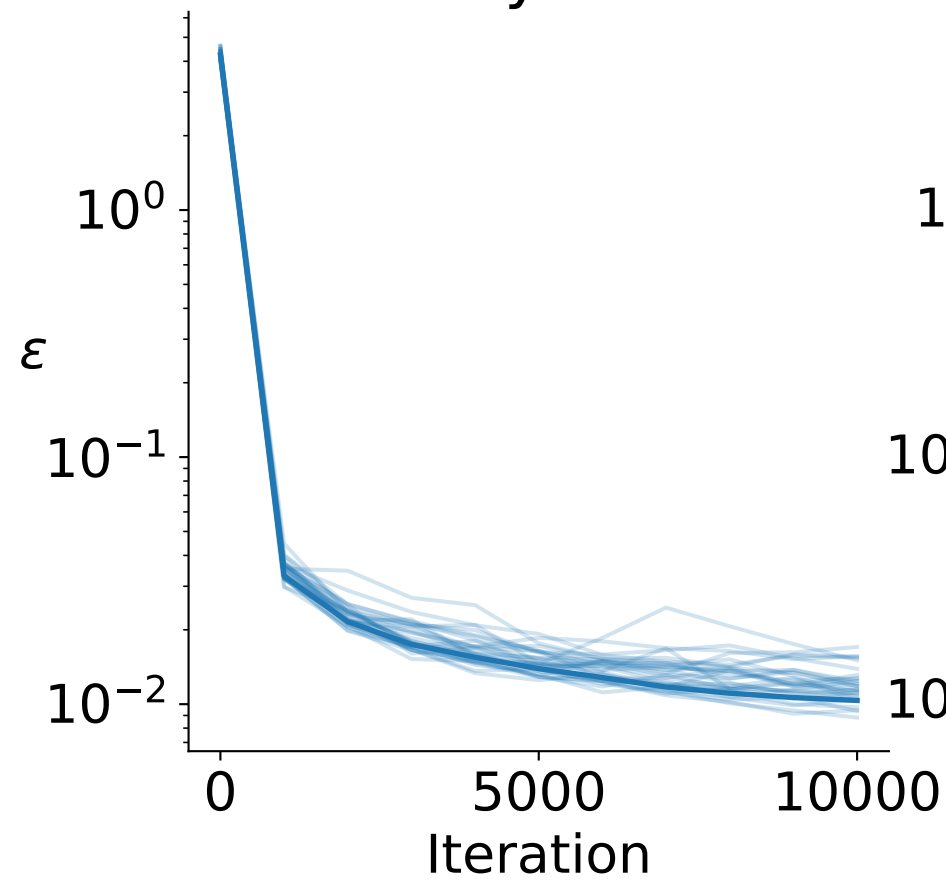

Player 2

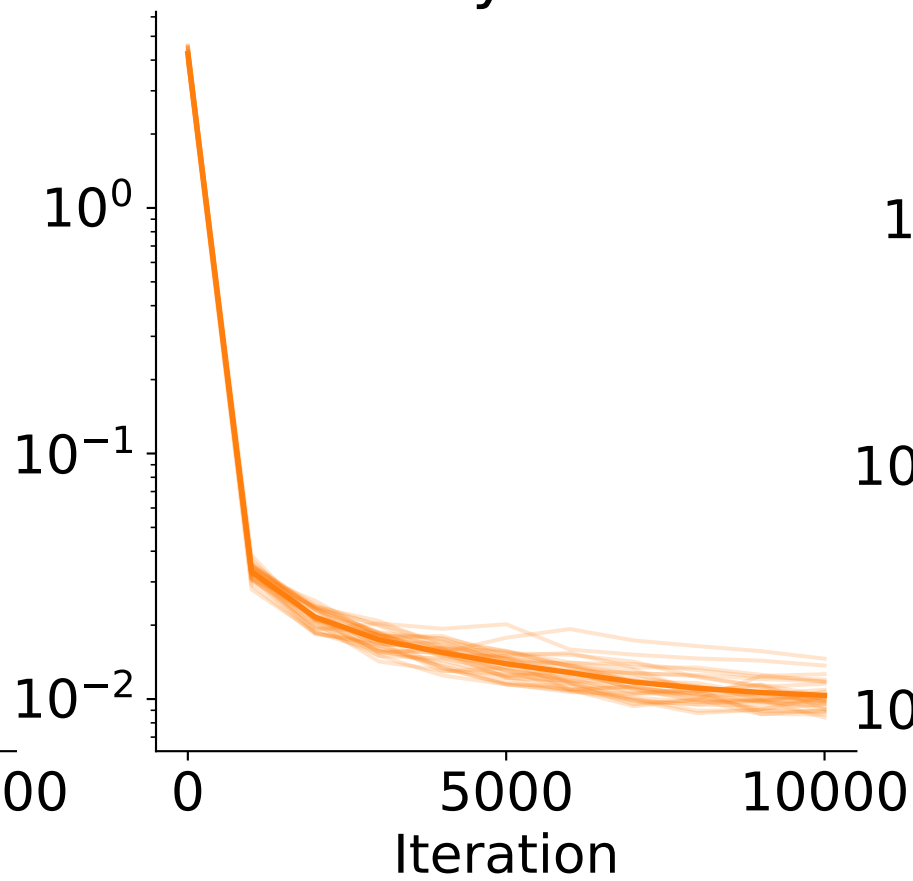

Player 3

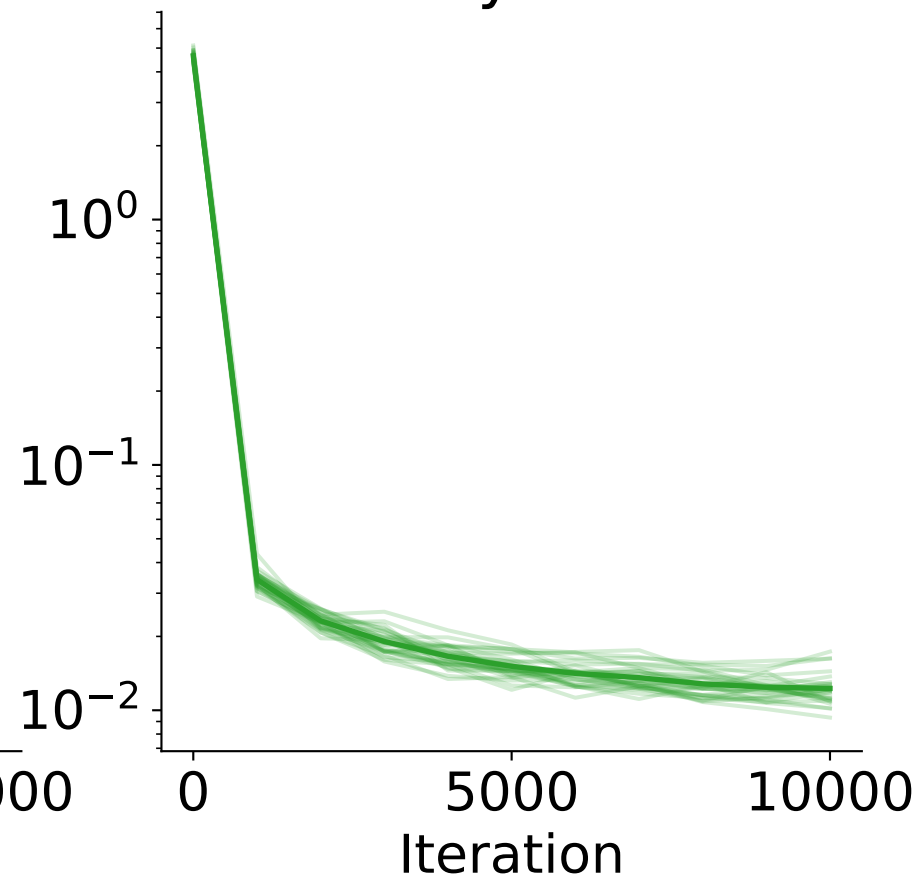

Supplement: supplementary_material [file attachment]

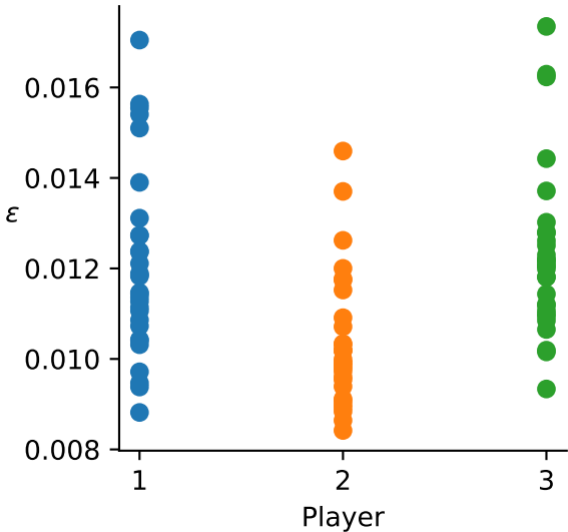

Supplement: supplementary_material [file attachment]

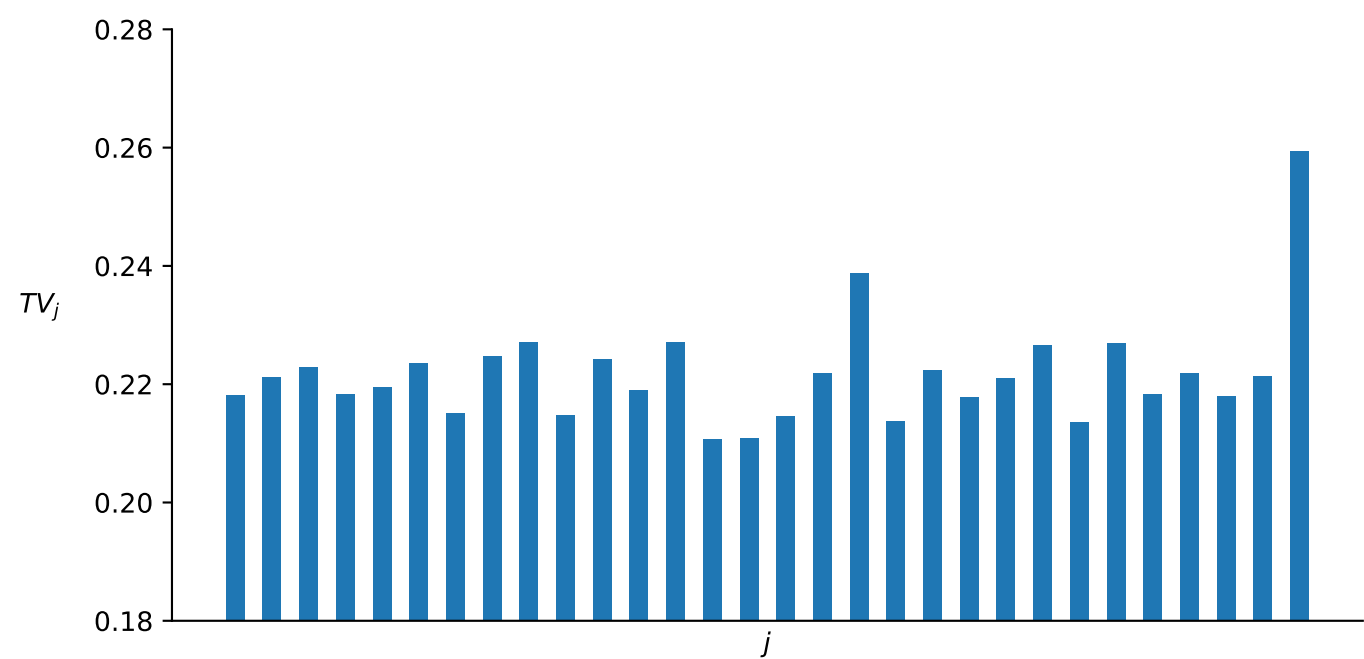

Supplement: supplementary_material [file attachment]

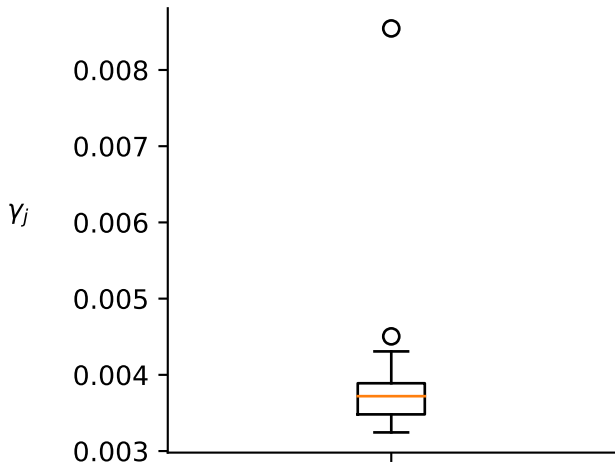

Supplement: supplementary_material [file attachment]

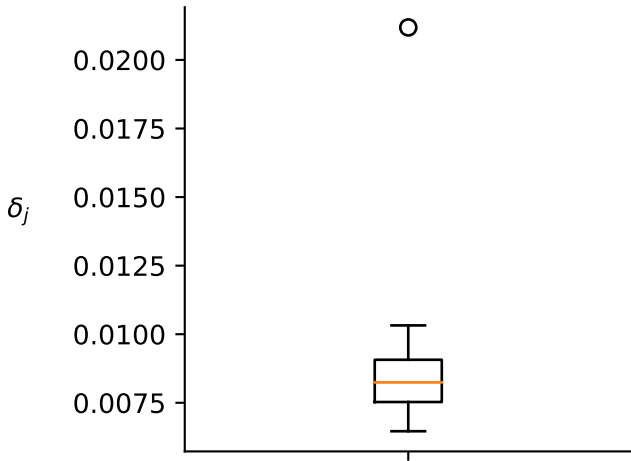

Supplement: supplementary_material [file attachment]

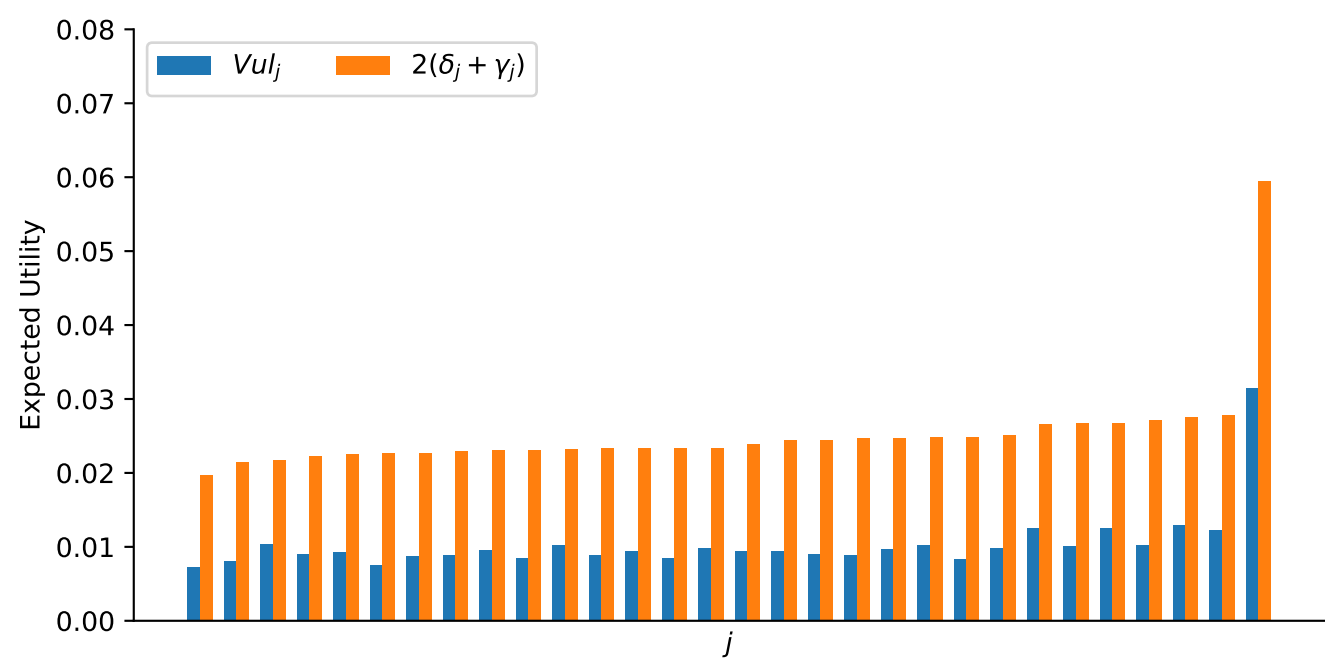

Supplement: supplementary_material [file attachment]
